# Supplementary material
Source: HighWire-hosted journal article supplement (http://qhc.bmj.com/highwire/filestream/147535/field_highwire_adjunct_files/1/bmjqs-2011-000460supp_figure2.pdf)
Supplement: bmjqs-2011-000460supp_figure2.pdf [file bmjqs-2011-000460supp_figure2.pdf]

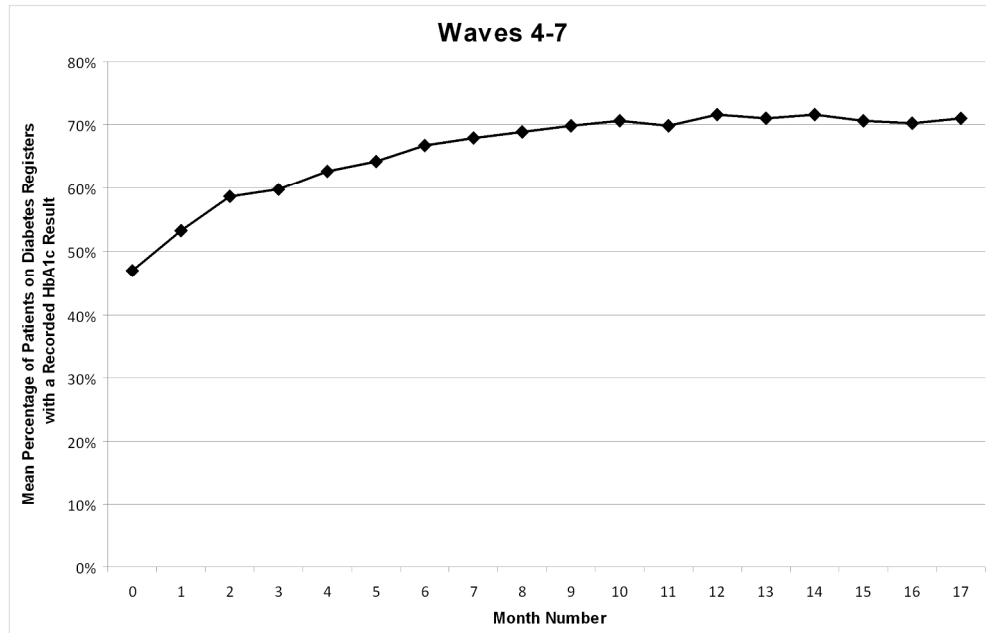

Appendix 2 Mean percentage of patients on registers with HbA1C recorded (n=743)  
This figure aggregates results from the seven waves occurring progressively over the project  
217x140mm (300 x 300 DPI)
